# Supplementary material
Source: MDPI journal article supplement (https://www.mdpi.com/2227-9717/10/8/1616)
Supplement: s1 [file s1]

## Supplementary Data

**Table S1.** Total variance explained *via* eigenvalues.

| Component | Eigenvalues |                  |                       |              |
|-----------|-------------|------------------|-----------------------|--------------|
|           | Eigenvalue  | % Total variance | Cumulative eigenvalue | Cumulative % |
| 1         | 5.04        | 50.39            | 5.04                  | 50.39        |
| 2         | 2.48        | 24.78            | 7.52                  | 75.17        |
| 3         | 1.41        | 14.13            | 8.93                  | 89.30        |
| 4         | 0.44        | 4.39             | 9.37                  | 93.69        |
| 5         | 0.32        | 3.24             | 9.69                  | 96.93        |
| 6         | 0.30        | 3.00             | 9.99                  | 99.93        |
| 7         | 0.01        | 0.07             | 10.00                 | 100.00       |
